# Supplementary material
Source: publisher figshare collection journal article supplement (https://acs.figshare.com/ndownloader/files/14763377)
Supplement: Supplementary file 1 [file 14763377]

# Ultra-Lightweight Strain-Responsive 3D Graphene Network

Dong Hae Ho,<sup>1†</sup> Hyun Min Jun,<sup>2†</sup> Seon Ju Yeo,<sup>4†</sup> Panuk Hong,<sup>1</sup> Min Jun Oh,<sup>2</sup> Byung Mook Weon,<sup>1,3</sup> Won Bo Lee,<sup>5</sup> S. Joon Kwon,<sup>4\*</sup> Pil J. Yoo,<sup>1,2\*</sup> Jeong Ho Cho<sup>6\*</sup>

<sup>1</sup>SKKU Advanced Institute of Nanotechnology (SAINT), <sup>2</sup>School of Chemical Engineering, <sup>3</sup>School of Advanced Materials Science and Engineering, Sungkyunkwan University (SKKU), Suwon 16419, Republic of Korea.

<sup>4</sup>Nanophotonics Research Center, Korea Institute of Science and Technology (KIST), Seoul 02792, Republic of Korea.

<sup>5</sup>School of Chemical and Biological Engineering, Institute of Chemical Processes, Seoul National University, Seoul 08826, Republic of Korea.

<sup>6</sup>Department of Chemical and Biomolecular Engineering, Yonsei University, Seoul 03722, Republic of Korea.

\*Corresponding authors: [cheme@kist.re.kr](mailto:cheme@kist.re.kr), [pjyoo@skku.edu](mailto:pjyoo@skku.edu), and [jhcho94@yonsei.ac.kr](mailto:jhcho94@yonsei.ac.kr)

<sup>†</sup>These authors contributed equally to this work.

**Table S1.** XPS results of GO and ODA-GO

|        | C (conc %) | O (conc %) | N (conc %) | C/O ratio | C/N ratio | O/N ratio |
|--------|------------|------------|------------|-----------|-----------|-----------|
| GO     | 67.0       | 32.8       | 0.2        | 2.0       | -         | -         |
| ODA-GO | 94.0       | 3.3        | 2.7        | 28.7      | 34.6      | 1.2       |

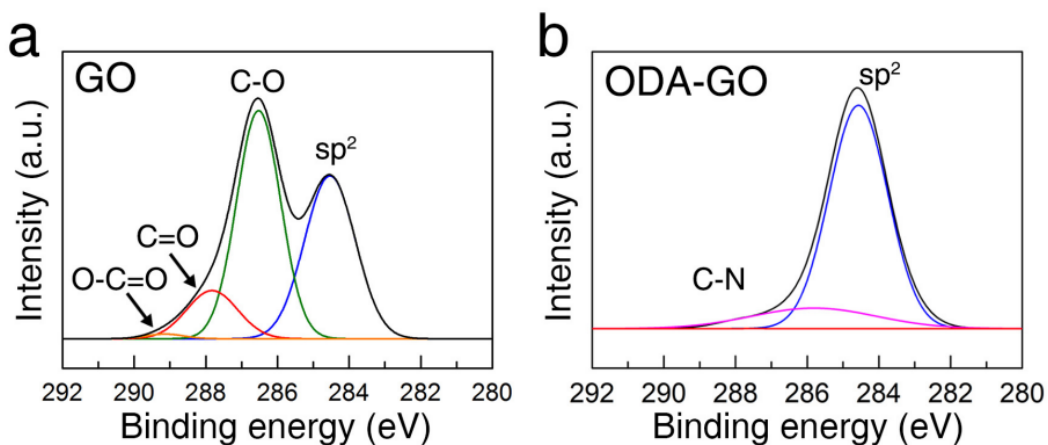**Figure S1.** Deconvoluted XPS spectra of the C1s orbitals of (a) GO and (b) ODA-GO.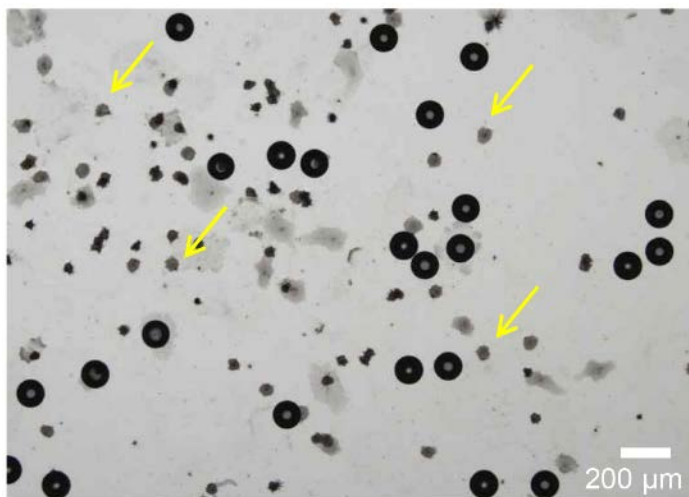**Figure S2.** Optical microscopy image showing the instability of bubble resulted from ultrathin-shelled spherical bubble with low concentration of ODA-GO nanosheets in toluene. The flow rates of the middle and outer phases were set at 1500 μl/h and 90 ml/h, respectively.

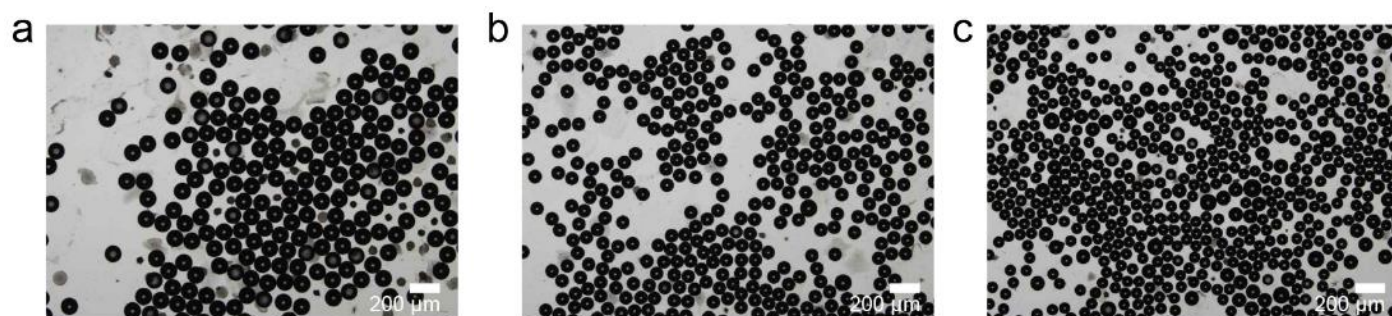

**Figure S3.** Optical microscopy images of the ODA-GO-shelled bubbles prepared at different outer flow rates (90 ml/h (a), 140 ml/h (b), and 180 ml/h (c)) with constant middle flow rate of 3000  $\mu\text{l/h}$ .

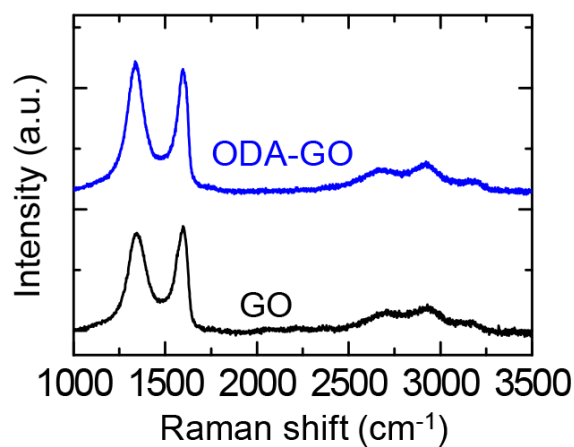

**Figure S4.** Raman spectra of GO and ODA-GO.

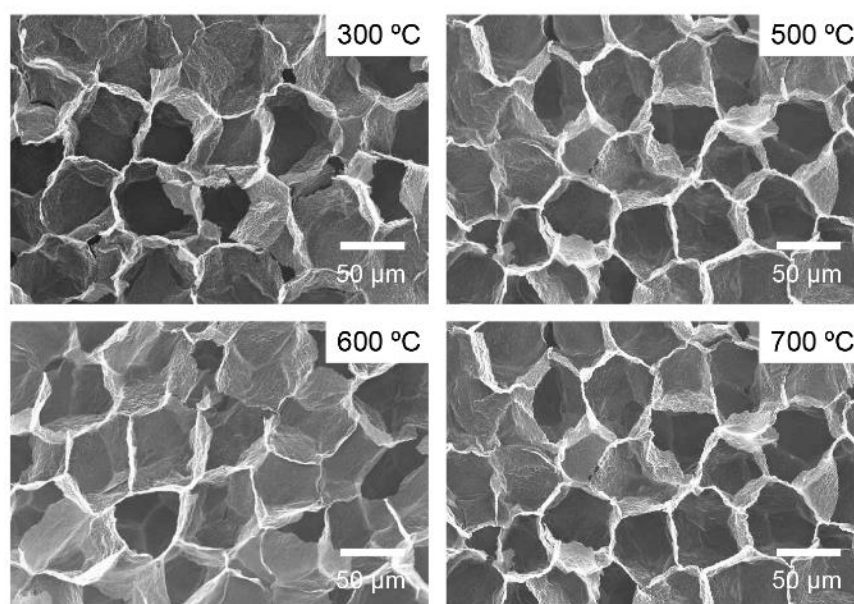

**Figure S5.** Scanning electron microscopy images of the 3D RDH structure reduced at 300, 500, 600, and 700°C.

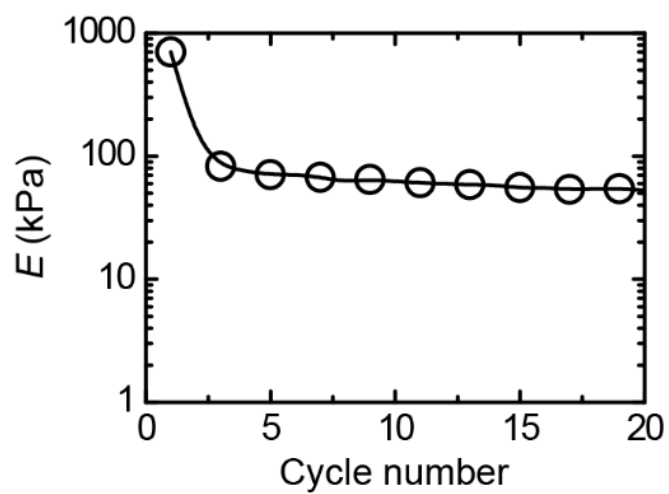

**Figure S6.** Young's modulus of the 3D RDH structure reduced at 700°C as a function of cycle number
